# Supplementary material for: Glycosylation with glycosyl benzyl phthalates as a new type of glycosyl donorElectronic supplementary information (ESI) available: Spectroscopic and analytical data for all new compounds. See http://www.rsc.org/suppdata/ob/b4/b405793g/
Source: Royal Society of Chemistry journal article supplement (doi:10.1039/b405793g), 2004-01-01
Supplement: b405793g.doc [file b405793g.doc]

**Supplementary Data**

**Glycosylation with glycosyl benzyl phthalates as a novel type of glycosyl donors**

Kwan Soo Kim, Yong Joo Lee, Hye Young, Kim Sung Soo Kang and Soon Young Kwon

*Center for Bioactive Molecular Hybrids and Department of Chemistry,*

*Yonsei University, Seoul 120-749, Korea.*

**2,3,4,6-Tetra-*O*-benzyl-D-glucopyranosyl benzyl phthalate (2)**: colorless oil ;R*f* = 0.27 (*n*-hexane/EtOAc, 4;1, v/v); 1H NMR (500 MHz, CDCl3) δ 3.62 - 4.01 (m, 15 H, Hα,β-2, 3, 4, 5, 6a, 6b), 4.4 - 5.39 (m, 25 H, 12.5 x PhC*H*2O), 5.82 (d, *J*1,2 7.6 Hz, 1 H, Hβ-1), 6.6 (d, *J*1,2 3.4 Hz, 1.5 H, Hα-1), 7.0 - 7.75 (m, 72.5 H, Ar*H*); 13C NMR (63 MHz, CDCl3) δ 67.6, 68.0, 68.2, 73.1, 73.2, 73.5, 73.6, 75.0, 75.1, 75.4, 75.7, 76.9, 77.3, 79.0, 80.9, 81.7, 84.8, 91.3 (Cα-1), 95.1(Cβ-1), 127.7, 127.8, 127.8, 127.9, 127.9, 128.0, 128.0, 128.1, 128.2, 128.3, 128.4, 128.4, 128.5, 128.6, 129.1, 129.3, 130.8, 131.0, 131.2, 131.5, 131.7, 131.8, 132.2, 132.8, 135.6, 135.7, 137.8, 137.9, 138.0, 138.1, 138.5, 138.7, 165.6 (C=O), 166.0 (C=O), 167.3 (C=O), 167.4 (C=O); IR (CHCl3 film) 1730, 1464, 1315, 1128 cm-1; Anal. Calcd for C49H46O9: C, 75.56; H, 5.95. Found: C, 75.57; H, 6.88.

**2-*O*-Acetyl-3,4,6-tri-*O*-benzyl--D-mannopyranosyl benzyl phthalate (4)**: R*f* = 0.15 (*n*-hexane/EtOAc, 4;1, v/v); []D20 = +20.4 (c = 5, CHCl3); 1H NMR (250 MHz, CDCl3) δ 2.19 (s, 3 H, C*H*3CO), 3.69–4.11 (m, 5 H, H-3, 4, 5, 6a, 6b), 4.48–4.88 (m, 6 H, 3 x PhC*H*2O), 5.30 (s, 2 H, PhC*H*2O), 5.60 (brs, 1 H, H-2), 6.34 (d, *J*1,2 1.9 Hz, 1 H, H-1), 7.13–7.76 (m, 24 H, Ar*H*); 13C NMR (63 MHz, CDCl3) δ 21.1 (*C*H3CO), 67.4, 67.7, 68.5, 72.0, 73.6, 73.7, 74.2, 75.5, 77.9, 93.0 (C-1), 127.7, 128.0, 128.1, 128.2, 128.4, 128.5, 128.7, 128.9, 129.4, 131.4, 135.4, 137.9,138.2, 165.4 (C=O), 167.0 (C=O), 170.1 (CH3*C*O); IR (CHCl3 film) 1741, 1281, 1230, 1107 cm-1; Anal. Calcd for C44H42O10: C, 72.31; H, 5.79. Found: C, 72.33; H, 5.87.

**3,4,6-Tri-*O*-benzyl-2-deoxy-D-*arabino*-hexopyranosyl benzyl phthalate (5)**: R*f* = 0.55 (n-hexane/EtOAc, 2:1, v/v); 1H NMR (250 MHz, CDCl3)  1.74–1.88 (m, 2 H, H-2a), 2.40 (m, 2 H, H-2b), 3.55–3.98 (m, 10 H, Hα,β-3, 4, 5, 6a, 6b), 4.45–4.67 (m, 10 H, 5 x PhC*H*2O), 4.87–4.90 (m, 2 H, PhC*H*2O), 5.21–5.36 (m, 4 H, 2 x PhC*H*2O), 5.80 (d, *J*1,2 9.2 Hz, 1 H, H-1β), 6.42 (brs, 1 H, H-1α), 7.16–7.74 (m, 48 H, Ar*H*); 13C NMR (63 MHz, CDCl3) δ 34.4 (C-2a), 35.3 (C-2b), 67.7, 68.7, 68.9, 71.8, 72.0, 73.6, 73.7, 74.1, 75.2, 75.4, 76.2, 77.7, 79.1, 93.4 (C-1α), 94.2 (C-1β), 127.9, 128.2, 128.6, 128.9, 129.3, 129.4, 131.3, 131.4, 131.6, 132.1, 132.6, 135.6, 135.8, 138.3, 138.5, 165.9 (C=O), 166.3 (C=O), 167.1 (C=O), 167.3 (C=O); IR (CHCl3 film) 1729, 1362, 1275, 1123, 1062 cm-1; Anal. Calcd for C42H40O8: C, 74.98; H, 5.99. Found: C, 74.96; H, 6.02.

**Methyl (2,3,4,6-tetra-*O*-benzyl--D-glucopyranosyl)-(1→6)-2,3,4-tri-*O*-benzoyl--D-glucopyranoside (15)** : colorless oil, R*f* = 0.60 (*n*-hexane/EtOAc, 2:1, v/v); []D20 = +53.6 (c = 1.6, CHCl3); 1H NMR (250 MHz, CDCl3)  3.43 (s, 3 H), 3.48 - 3.66 (m, 5 H), 3.81 (m, 2 H), 3.96 (dd, *J* = 9.3, 9.3 Hz, 1 H), 4.24 - 4.28 (m, 1 H), 4.37 (d, *J* = 12.3 Hz, 1 H), 4.44 (d, *J* = 11.0 Hz, 1 H), 4.55 (d, *J* = 12.3 Hz, 1 H), 4.62 (d, *J* = 12.5 Hz, 1 H), 4.73 (s, 2 H), 4.79 (s, 1 H), 4.81 (d, *J* = 12.5 Hz, 1 H), 4.91 (d, *J* = 11.0 Hz, 1 H), 5.19-5.24 (m, 2 H), 5.52 (dd, *J* = 9.7, 9.7 Hz, 1 H), 6.13 (dd, *J* = 9.7, 9.7 Hz, 1 H), 7.11 - 7.57 (m, 29 H), 7.80 - 8.09 (m, 6 H); 13C NMR (63 MHz, CDCl3)  55.7, 66.8, 68.4, 68.7, 69.8, 70.4, 70.8, 72.4, 73.3, 73.5(2), 74.9, 75.7, 80.1, 82.0, 96.9, 97.4, 127.6, 127.8(2), 128.0, 128.1, 128.4(2), 128.5(2),  128.7, 129.3, 129.5, 129.9, 130.0, 130.1, 133.2, 133.5(2), 138.0, 138.5, 138.7, 139.0, 165.4, 166.0(2); IR (CHCl3 film) 2933, 1736, 1278, 1101 cm-1; Anal. Calcd for C62H60O14: C, 72.36; H, 5.88. Found: C, 72.33; H, 5.88.

**` Methyl (2,3,4,6-tetra-*O*-benzyl--D-glucopyranosyl)-(1→6)-2,3,4-tri-*O*-benzoyl--D-glucopyranoside (15)** : colorless oil, R*f* = 0.65 (*n*-hexane/EtOAc, 2:1, v/v); []D20 = +3.2 (c = 0.8, CHCl3); 1H NMR (250 MHz, CDCl3)  3.37 (s, 3 H), 3.43 - 3.71 (m, 6 H), 3.80 (dd, *J* = 7.5, 10.8 Hz, 1 H), 4.10 - 4.14 (m, 1 H), 4.35 - 4.55 (m, 5 H), 4.66 - 4.82 (m,3 H), 4.91 (d, *J* = 10.9 Hz, 1 H), 5.06 (d, *J* = 10.9 Hz, 1 H), 5.20 - 5.32 (m, 2 H), 5.47 (dd, *J* = 9.7, 9.7 Hz, 1 H), 6.17 (dd, *J* = 9.7, 9.7 Hz, 1 H), 7.13 - 7.53 (m, 29 H), 7.83 - 7.98 (m, 6 H); 13C NMR (63 MHz, CDCl3)  55.6, 68.8, 69.0, 69.1, 70.0, 70.6, 72.3, 73.6, 74.9, 75.0, 75.1, 75.8, 77.8, 82.5, 84.7, 96.9, 104.1, 127.7, 127.8, 127.9, 128.0, 128.1, 128.3, 128.4, 128.5(2), 129.1, 129.2, 129.4, 129.8, 130.0, 130.1, 133.2, 133.5(2), 138.3, 138.6, 138.8, 165.6, 165.9, 166.0; IR (CHCl3 film) 2931, 1729, 1281, 1103 cm-1; Anal. Calcd for C62H60O14: C, 72.36; H, 5.88. Found: C, 72.34; H, 5.88.

**Methyl (2,3,4,6-tetra-*O*-benzyl--D-glucopyranosyl)-(1→6)-2,3,4-tri-*O*-benzoyl--D-mannopyranoside (16)** : colorless oil, R*f* = 0.35 (toluene/EtOAc, 10:1, v/v); []D20 = -35.9 (c = 1.2, CHCl3); 1H NMR (250 MHz, CDCl3)  3.39-3.66 (m, 7 H), 3.48 (s, 3 H), 3.82-4.00 (m, 2 H), 4.33 (d, *J* = 12.0 Hz, 1 H), 4.44 (d, *J* = 11.0 Hz, 1 H), 4.50 (d, *J* = 12.2 Hz, 1 H), 4.57 (d, *J* = 12.2 Hz, 1 H), 4.70-4.77 (m, 3 H), 4.81 (d, *J* = 11.1 Hz, 1 H), 4.87 (d, *J* = 11.0 Hz, 1 H), 4.93 (d, *J* = 1.2 Hz, 1 H), 5.66 (s, 1 H), 5.76-5.87 (m, 2 H), 7.11-7.57 (m, 29 H), 7.80-8.06 (m, 6 H); 13C NMR (63 MHz, CDCl3)  55.6, 67.4, 67.6, 68.4, 69.7, 70.3, 70.7, 73.2, 73.5, 74.9, 75.6, 80.1, 82.0, 97.4, 98.6, 127.6, 127.8 (2), 128.0, 128.1, 128.4 (2), 128.5 (2), 128.7, 129.3, 129.5, 129.9, 130.0, 130.1, 133.2, 133.5 (2), 138.0, 138.5, 138.7, 139.0, 165.5, 165.6, 165.7; IR (CHCl3 film) 1734, 1266, 1103 cm-1; Anal. Calcd for C62H60O14: C, 72.36; H, 5.88. Found: C, 72.31; H, 5.87.

**Methyl (2,3,4,6-tetra-*O*-benzyl--D-glucopyranosyl)-(1→6)-2,3,4-tri-*O*-benzoyl--D-mannopyranoside (16)** : colorless oil, R*f* = 0.40 (toluene/EtOAc, 10:1, v/v); []D20 = -51.7 (c = 1.6, CHCl3); 1H NMR (250 MHz, CDCl3)  3.42 (s, 3 H), 3.46-3.64 (m, 6 H), 3.86 (dd, *J* = 7.8, 10.8 Hz, 1 H), 4.18 (dd, *J* = 1.6, 9.3 Hz, 1 H), 4.33 - 4.55 (m, 5 H), 4.67 (d, *J* = 10.8 Hz, 1 H), 4.75 (d, *J* = 10.9 Hz, 1 H), 4.80 (d, *J* = 11.4 Hz, 1 H), 4.90 (d, *J* = 10.9 Hz, 1 H), 4.96 (d, *J* = 1.1 Hz, 1 H), 5.10 (d, *J* = 10.8 Hz, 1 H), 5.65 (dd, *J* = 1.7, 3.3 Hz, 1 H), 5.79 (dd, *J* = 9.9, 9.9 Hz, 1 H), 5.90 (dd, *J* = 3.3, 9.9 Hz, 1 H), 7.11-7.60 (m, 29 H), 7.81-8.08 (m, 6 H); 13C NMR (63 MHz, CDCl3)  55.5, 67.7, 68.8, 69.4, 70.0, 70.2, 70.7, 73.5, 74.9, 75.0, 75.1, 75.8, 82.5, 84.6, 98.4, 104.2, 127.7, 127.8, 128.0, 128.4, 128.5, 128.7, 129.3, 129.5, 129.8, 130.0, 133.2, 133.5, 133.6, 138.2, 138.6, 138.7, 165.5, 165.7, 165.8; IR (CHCl3 film) 1729, 1266, 1072 cm-1; Anal. Calcd for C62H60O14: C, 72.36; H, 5.88. Found: C, 72.39; H, 5.84.

**2,3,4,6-Tetra-*O*-benzyl-,-D-glucopyranosyl-(1→6)-1,2:3,4-di-*O*-isopropylidene--D-galactopyranose (17,)**1: colorless oil, R*f* = 0.35 (*n*-hexane/EtOAc, 3:1, v/v);  **17**1 (major); 1H NMR (250 MHz, CDCl3)  3.31 (s, 6 H), 1.45 (s, 3 H), 3.53 (s, 3 H), 3.43 - 3.49 (m, 1 H), 3.56 - 3.79 (m, 4 H), 3.97 (d, *J* = 9.2 Hz, 1 H), 4.03 (d, *J* = 4.1 Hz, 1 H), 4.25 (d, *J* = 9.3 Hz, 1 H), 4.30 - 4.37 ( m, 2 H), 4.46 (d, *J* = 11.6 Hz, 1 H), 4.47 (d, *J* = 10.9 Hz, 1 H), 4.5 (d, *J* = 6.2 Hz, 1 H), 4.59 (s, 1H), 4.63 (d, *J* = 12.1 Hz, 1 H), 4.67 (d, *J* = 11.2 Hz, 1 H), 4.75 (d, *J* = 11.7 Hz, 1 H), 4.80 (d, *J* = 10.6 Hz, 1 H), 4.82 (d, *J* = 12.3 Hz, 1 H), 4.98 (d, *J* = 11.0 Hz, 1 H), 5.05 (d, *J* = 11.1 Hz, 1 H), 5.57 (d, *J* = 5.0 Hz, 1 H), 7.12 - 7.42 (m, 20 H); 13C NMR (63 MHz, CDCl3)  24.6, 25.0, 26.1, 26.2, 65.8, 67.5, 70.7, 70.8, 70.9, 73.6, 74.9, 75.1(2), 75.7, 77.8, 81.7, 82.1, 84.7, 96.4, 104.5, 108.7, 109.5, 127.5, 127.6, 127.7, 127.8, 127.9, 128.0, 128.1, 128.3, 128.5, 128.8, 138.3, 138.5, 138.8(2); **17** (minor); 13C NMR (63 MHz, CDCl3) δ 97.2; IR (CHCl3 film) 1459, 1387, 1255, 1210, 1113, 1067 cm-1.

**Methyl (2,3,4,6-tetra-*O*-benzyl--D-glucopyranosyl)-(1→4)-2,3,6-tri-*O*-benzyl--D-glucopyranoside (18)**2: colorless oil, R*f* = 0.65 (CH2Cl2/EtOAc, 10:0.3, v/v); []D20 = +46.2 (c = 0.5, CHCl3) [lit2; []D23 = +47.5 (c = 0.7, CHCl3)]; 1H NMR (500 MHz, CDCl3)  3.37 (s, 3 H), 3.37 - 3.40 (m, 1 H), 3.48 - 3.50 (m, 2 H), 3.59 (dd, *J* = 3.2, 9.0 Hz, 1 H), 3.64 (dd, *J* = 9.3, 9.3 Hz, 1 H), 3.65 (d, *J* = 9.2 Hz, 1 H), 3.72 (d, *J* = 9.8 Hz, 1 H), 3.82 - 3.85 (m, 2 H), 3.90 (dd, *J* = 9.3, 9.3 Hz, 1 H), 4.03 (dd, *J* = 9.1, 9.1 Hz, 1 H), 4.08 (dd, *J* = 8.9, 8.9 Hz, 1 H), 4.28 (d, *J* = 12.1 Hz, 1 H), 4.42 (d, *J* = 10.9 Hz, 1 H), 4.49 (s, 2 H), 4.51 (d, *J* = 12.1 Hz, 1 H), 4.53 (d, *J* = 10.6 Hz, 1 H), 4.57 (d, *J* = 11.3 Hz, 1 H), 4.59 (d, *J* = 11.3 Hz, 1 H), 4.60 (d, *J* = 2.7 Hz, 1 H), 4.69 (d, *J* = 12.1 Hz, 1 H), 4.77 (d, *J* = 10.7 Hz, 1 H), 4.78 (d, *J* = 10.5 Hz, 1 H), 4.80 (d, *J* = 11.4 Hz, 1 H), 4.87 (d, *J* = 10.8 Hz, 1 H), 5.02 (d, *J* = 11.6 Hz, 1 H), 5.68 (d, *J* = 3.1 Hz, 1 H), 7.10 - 7.26 (m, 35 H); 13C NMR (125 MHz, CDCl3)  55.2, 68.3, 69.2, 69.7, 71.1, 72.5, 73.1, 73.3, 73.5, 73.6, 74.5, 75.0, 75.6, 77.8, 79.6, 80.3, 82.1(2), 96.8, 97.9, 127.1, 127.2, 127.3, 127.4, 127.5, 127.9, 128.0, 128.2, 128.4, 138.1(2), 138.4, 138.6, 139.0, 139.1; IR (CHCl3 film) 1500, 1364, 1362, 1168, 1107, 1051 cm-1.

**Methyl (2,3,4,6-tetra-*O*-benzyl--D-glucopyranosyl)-(1→4)-2,3,6-tri-*O*-benzyl--D-glucopyranoside (18)**2: solid, mp 88 – 89 ℃; R*f* = 0.5 (CH2Cl2/EtOAc, 10:0.3, v/v); []D20 = +19 (c = 0.4, CHCl3) [lit2; []D20 = +20 (c = 1, CHCl3)]; 1H NMR (500 MHz, CDCl3)  3.26 (dd, *J* = 3.6, 15.2 Hz, 1 H), 3.35 (s, 3 H), 3.34 - 3.37 (m, 1 H), 3.44 - 3.49 (m, 3 H), 3.54 (dd, *J* = 4.43, 10.9 Hz, 1 H), 3.57 3.61 (m, 2 H), 3.57 - 3.61 (m, 1 H), 3.71 (d, *J* = 10.8 Hz, 1 H), 3.82 - 3.86 (m, 1 H), 3.96 (dd, *J* = 9.4, 9.4 Hz, 1 H), 4.36 - 4.39 (m, 2 H), 4.37 (d, *J* = 12.1 Hz, 1 H), 4.43 (d, *J* = 12.1 Hz, 1 H), 4.55 (d, *J* = 11.5 Hz, 1 H), 4.57 (d, *J* = 4.5 Hz, 1 H), 4.56 - 4.60 (m, 2 H), 4.72 - 4.81 (m, 6 H), 4.86 (d, *J* = 10.9 Hz, 1 H), 5.08 (d, *J* = 11.3 Hz, 1 H), 7.18 - 7.41 (m, 35 H); 13C NMR (125 MHz, CDCl3)  55.4, 68.04, 69.2, 70.1, 73.5(2), 73.8, 74.9, 75.1, 75.3, 75.5, 75.7, 76.8, 78.22, 79.0, 80.6, 83.0, 85.0, 98.6, 102.7, 127.2, 127.4, 127.7, 127.9, 128.1, 128.4, 128.5, 138.0, 138.4, 138.6, 138.8(2), 139.7; IR (CHCl3 film) 1459, 1362, 1072 cm-1.

**Methyl (2,3,4,6-tetra-*O*-benzyl--D-glucopyranosyl)-(1→4)-2,3,6-tri-*O*-benzyl--D-mannopyranoside (19)** : colorless oil, R*f* = 0.4 (*n*-hexane/EtOAc, 3:1, v/v); []D20 = +54.4 (c = 1.2, CHCl3); 1H NMR (500 MHz, CDCl3)  3.30 – 3.34 (m, 1 H), 3.37 (s, 3 H), 3.44 - 3.53 (m, 3 H), 3.63 (d, *J* = 9.2 Hz, 1 H), 3.69 (d, *J* = 9.8 Hz, 1 H), 3.74 (d, *J* = 9.5 Hz, 1 H), 3.83 - 3.86 (m, 4 H), 4.05 (d, *J* = 6.2 Hz, 1 H), 4.24 (d, *J* = 12.1 Hz, 1 H), 4.39 (d, *J* = 11.2 Hz, 1 H), 4.41 (d, *J* = 6.5 Hz, 1 H), 4.42 (d, *J* = 7.5 Hz, 1 H), 4.49 (d, *J* = 12.3 Hz, 1 H), 4.50 - 4.54 (m, 4 H), 4.6 (d, *J* = 12.3 Hz, 1 H), 4.63 (d, *J* = 7.6 Hz, 1 H), 4.63 (s, 1 H), 4.75 (d, *J* = 8.9 Hz, 1 H), 4.82 ( br s, 1 H), 4.90 (d, *J* = 10.8 Hz, 1 H), 5.74 (d, *J* = 3.7 Hz, 1 H), 7.07 - 7.30 (m, 35 H); 13C NMR (125 MHz, CDCl3)  54.9, 68.2, 69.8, 70.5, 70.8, 71.0, 71.3, 72.5, 72.6, 73.5, 73.6, 74.3, 75.1, 75.6, 79.5, 80.8, 82.0, 96.9, 99.0, 126.9, 127.4, 127.5, 127.7, 127.7, 127.8, 127.9, 128.0, 128.2, 128.3, 128.4, 128.4, 128.5, 138.1, 138.2, 138.5, 138.7, 138.7, 139.1; IR (CHCl3 film) 1454, 1368, 1107, 1072 cm-1; Anal. Calcd for C62H66O11: C, 75.43; H, 6.74. Found: C, 75.41; H, 6.81.

**Methyl (2,3,4,6-tetra-*O*-benzyl--D-glucopyranosyl)-(1→4)-2,3,6-tri-*O*-benzyl--D-mannopyranoside (19)**: solid, mp 84 – 86 ℃; R*f* = 0.4 (*n*-hexane/EtOAc, 3:1, v/v); []D20 = +35.8 (c = 1.2, CHCl3); 1H NMR (500 MHz, CDCl3)  3.28 - 3.30 (m, 1 H), 3.33 (s, 3 H), 3.33 – 3.38 (m, 1 H), 3.53 (dd, *J* = 9.0, 9.0 Hz, 1 H), 3.57 – 3.61 (m, 2 H), 3.64 - 3.72 (m, 3 H), 3.75 (br s, 1 H), 3.80 - 3.87 (m, 2 H), 4.30 (dd, *J* = 8.6, 8.6 Hz, 1 H), 4.43 (d, *J* = 12.1 Hz, 1 H), 4.46 - 4.49 (m, 3 H), 4.56 (d, *J* = 11.0 Hz, 1 H), 4.60 (d, *J* = 12.1 Hz, 1 H), 4.60 (d, *J* = 12.1 Hz, 1 H), 4.66 (d, *J* = 12.4 Hz, 1 H), 4.68 - 4.73 (m, 3 H), 4.78 (d, *J* = 11.1 Hz, 1 H), 4.79 (d, *J* = 7.9 Hz, 1 H), 4.80 (d, *J* = 11.8 Hz, 1 H), 4.84 (d, *J* = 7.1 Hz, 1 H), 4.86 (dd, *J* = 6.5, 6.5 Hz, 1 H), 7.18 - 7.36 (m, 35 H); 13C NMR (125 MHz, CDCl3)  55.0, 68.9, 69.0, 72.0, 72.8, 73.0, 73.4, 73.7, 75.0, 75.0, 75.3, 75.4, 75.8, 76.1, 78.1, 78.3, 83.0, 85.0, 99.8, 103.1, 127.2, 127.5, 127.7, 127.9, 128.4, 138.4, 138.7(2), 139.6; IR (CHCl3 film) 1494, 1464, 1367, 1072 cm-1 ; Anal. Calcd for C62H66O11: C, 75.43; H, 6.74. Found: C, 75.48; H, 6.75.

**Methyl (2,3,4,6-tetra-*O*-benzyl--D-mannopyranosyl)-(1→6)-2,3,4-tri-*O*-benzoyl--D-glucopyranoside (20)** : colorless oil, R*f* = 0.35 (toluene/EtOAc, 10:1, v/v); 1H NMR (250 MHz, CDCl3)  3.38 (s, 3 H), 3.52 - 3.70 (m, 5 H), 3.84 - 4.00 (m, 3 H), 4.13 - 4.20 (m, 1 H), 4.39 (d, *J* = 12.1 Hz, 1 H), 4.45 - 4.49 (m, 3 H), 4.55 (d, *J* = 12.1 Hz, 1 H), 4.67 (d, *J* = 12.6 Hz, 1 H), 4.73 (d, *J* = 12.6 Hz, 1 H), 4.87 (d, *J* = 10.9 Hz, 1 H), 4.92 (d, *J* = 1.4 Hz, 1 H), 5.17 (d, *J* = 3.6 Hz, 1 H), 5.23 (dd, *J* = 9.8, 3.6 Hz, 1 H), 5.57 (dd, *J* = 9.8, 9.8 Hz, 1 H), 6.12 (dd, *J* = 9.8, 9.8 Hz, 1 H), 7.15-7.52 (m, 29 H), 7.84-8.00 (m, 6 H); 13C NMR (63 MHz, CDCl3)  55.6, 66.3, 68.2, 69.1, 70.0, 70.6, 72.0, 72.2(2), 72.7, 73.3, 74.9(2), 75.1, 80.0, 97.0, 98.3, 127.5(2), 127.6, 127.8, 127.9, 128.0, 128.3, 128.4(2), 128.5(2), 129.2(2), 129.4, 129.7, 130.0(2), 133.1, 133.3, 133.4, 138.5, 138.6, 138.7, 138.8, 165.2, 165.9(2). Anal. Calcd for C62H60O14: C, 72.36; H, 5.88. Found: C, 72.34; H, 5.88.

**Methyl (2,3,4,6-tetra-*O*-benzyl--D-mannopyranosyl)-(1→6)-2,3,4-tri-*O*-benzoyl--D-glucopyranoside (20)** : coloress oil, R*f* = 0.30 (toluene/EtOAc, 10:1, v/v); 1H NMR (250 MHz, CDCl3)  3.35-3.40 (m, 1 H), 3.43 (s, 3 H), 3.49 (dd, *J* = 9.4, 2.9 Hz, 1 H), 3.62-3.66 (m, 1 H), 3.69-3.71 (m, 2 H), 3.88 (dd, *J* = 9.5, 9.5 Hz, 1 H), 4.05 (d, *J* = 2.9 Hz, 1 H), 4.20 (dd, *J* = 11.0, 1.9 Hz, 1 H), 4.28-4.35 (m, 1 H), 4.40 (d, *J* = 6.2 Hz, 1 H), 4.47-4.51 (m, 4 H), 4.55 (d, *J* = 6.5 Hz, 1 H), 4.89 (d, *J* = 10.8 Hz, 1 H), 4.91 (d, *J* = 12.4 Hz, 1 H), 5.04 (d, *J* = 12.4 Hz, 1 H), 5.25-5.29 (m, 2 H), 5.52 (dd, *J* = 9.6, 9.6 Hz, 1 H), 6.18 (dd, *J* = 9.6, 9.6 Hz, 1 H), 7.14 - 7.53 (m, 29 H), 7.84 - 8.00 (m, 6 H); 13C NMR (63 MHz, CDCl3)  55.5, 68.7, 69.0, 69.5, 69.6, 70.7, 71.5, 72.3, 73.5, 74.0, 74.2, 74.8, 75.2, 76.1, 82.2, 96.9, 102.4, 127.5, 127.7, 127.7, 127.9, 128.1, 128.3(2), 128.4(3), 128.5, 129.0, 129.2, 129.4, 129.8, 129.9, 130.0, 133.2, 133.5(2), 138.3, 138.5(2), 138.9, 165.5, 165.8, 166.0. Anal. Calcd for C62H60O14: C, 72.36; H, 5.88. Found: C, 72.36; H, 5.90.

**Methyl (2,3,4,6-tetra-*O*-benzyl-,-D-mannopyranosyl)-(1→6)-2,3,4-tri-*O*-benzoyl--D-mannopyranoside (21)** : **21** (major); coloress oil, R*f* = 0.37 (*n*-hexane/EtOAc, 2.5;1, v/v); 1H NMR (500 MHz, CDCl3)  3.43 (s, 3H), 3.57 (d, *J* = 10.5 Hz, 1 H), 3.68 - 3.71 (m, 4 H), 3.85 (d, *J* = 7.1 Hz, 1 H), 3.93 - 3.98 (m, 2 H), 4.17 - 4.19 (m, 1 H), 4.36 (d, *J* = 11.6 Hz, 1 H), 4.39 - 4.41 (m, 2 H), 4.47 (d, *J* = 11.2 Hz, 1 H), 4.56 (d, *J* = 12.1 Hz, 1 H), 4.61 and 4.64 (ABq, *J* = 12.6 Hz, 2 H), 4.84 (d, *J* = 11.1 Hz, 1 H), 4.93 (br s, 1 H), 4.96 (br s, 1 H), 5.63 (s, 1 H), 5.85 - 5.86 (m, 1 H), 5.93 (dd, *J* = 9.9, 9.9 Hz, 1 H), 7.14 - 8.08 (m, 35 H); 13C NMR (125 MHz, CDCl3)  55.5, 66.9, 68.0, 69.1, 69.2, 70.1, 70.7, 71.9, 72.0, 72.6, 73.3, 74.8, 74.9, 75.1, 80.3, 98.2, 98.6, 127.6, 127.8, 128.1, 128.4, 128.5, 128.7, 129.2, 129.5, 129.8, 129.3, 133.2, 133.4, 133.6, 138.4, 138.5, 138.7, 165.4, 165.5, 165.6; **21** (minor); 13C NMR (125 MHz, CDCl3)  102.5 (C-1); IR (CHCl3 film) 1734, 1601, 1494, 1459, 1270, 1107 cm-1; Anal. Calcd for C62H60O14: C, 72.36; H, 5.88. Found: C, 72.37; H, 5.81.

**2,3,4,6-Tetra-*O*-benzyl--D-mannopyranosyl-(1→6)-1,2:3,4-di-*O*-isopropylidene--D-galactopyranose (22)**3: colorless oil, R*f* = 0.35 (*n*-hexane/EtOAc, 3;1, v/v);  []D20 = -2.2 (c = 0.7, CHCl3) [lit3; []D20 = -2.6 (c = 2.3 CHCl3)]; 1H NMR (500 MHz, CDCl3)  1.33 (s, 6 H), 1.43 (s, 3 H), 1.50 (s, 3 H), 3.68 - 3.73 (m, 3 H), 3.77 - 3.83 (m, 4 H), 3.90 (dd, *J* = 2.6, 9.3 Hz, 1 H), 3.96 (dd, *J* = 6.4, 6.4 Hz, 1 H), 4.02 (dd, *J* = 9.1, 9.1 Hz, 1 H), 4.15 (d, *J* = 7.8 Hz, 1 H), 4.31 (d, *J* = 2.5 Hz, 1 H), 4.51 (d, *J* = 10.2 Hz, 1 H), 4.53 (d, *J* = 10.2 Hz, 1 H), 4.58 (br s, 2 H), 4.68 (d, *J* = 12.1 Hz, 1 H), 4.73 (br s, 2 H), 4.86 (d, *J* = 10.8 Hz, 1 H), 5.01 (br s, 1 H), 5.52 (d, *J* = 4.9 Hz, 1 H), 7.15 - 7.38 (m, 20 H); 13C NMR (125 MHz, CDCl3)  24.7, 25.1, 26.1, 26.3, 65.5, 65.6, 69.3, 70.8(2), 71.1, 72.3(2), 72.5, 73.5, 74.2, 75.0, 75.2, 80.2, 96.5, 97.5, 108.7, 109.5, 127.7, 127.9, 128.2, 128.4, 138.6, 138.6(2), 138.7; IR (CHCl3 film) 1459, 1387, 1255, 1209, 1112, 1067, 1005 cm-1.

**2,3,4,6-Tetra-*O*-benzyl--D-mannopyranosyl-(1→6)-1,2:3,4-di-*O*-isopropylidene--D-galactopyranose (22)**3 : colorless oil, R*f* = 0.32 (*n*-hexane/EtOAc, 3;1, v/v);  []D20 = -72.8 (c = 0.4, CHCl3) [lit3; []D20 = -72.6 (c = 2.7, CHCl3); 1H NMR (500 MHz, CDCl3)  1.32 (s, 3 H), 1.33 (s, 3 H), 1.44 (s, 3 H), 1.48 (s, 3 H), 3.41 - 3.44 (m, 1 H), 3.47 (dd, *J* = 2.6, 9.3 Hz, 1 H), 3.62 (dd, *J* = 8.6, 10.5 Hz, 1 H), 3.74 - 3.78 (m, 2 H), 3.40 (dd, *J* = 9.5, 9.5 Hz, 1 H), 4.0 (d, *J* = 2.3 Hz, 1 H), 4.11 (d, *J* = 7.9 Hz, 1 H), 4.20 - 4.23 (m, 2 H), 4.33 - 4.36 (m, 2 H), 4.45 (d, *J* = 12.2 Hz, 1 H), 4.46 (br s, 1H), 4.51 (d, *J* = 10.7 Hz, 1 H), 4.56 (d, *J* = 12.1 Hz, 1 H), 4.61 (d, *J* = 9.9 Hz, 1 H), 4.64 (d, *J* = 12.3 Hz, 1 H), 4.90 (d, *J* = 10.7 Hz, 1 H), 4.91 (d, *J* = 12.6 Hz, 1 H), 5.01 (d, *J* = 12.4 Hz, 1 H), 5.59 (d, *J* = 4.8 Hz, 1 H), 7.16 - 7.51 (m, 20 H); 13C NMR (125 MHz, CDCl3)  24.6, 25.2, 26.1, 30.0, 68.2, 69.7, 70.0, 70.7, 70.9, 71.2, 71.8, 72.9, 73.6, 73.7, 74.9, 75.3, 76.0, 82.1, 96.6, 102.5, 108.9, 109.6, 127.7, 128.1, 128.2, 128.3, 128.4, 128.8, 138.3, 138.6(2), 138.8 ; IR (CHCl3 film) 2365, 2340, 1596, 1382, 1107, 1067 cm-1.

**Methyl (2,3,4,6-tetra-*O*-benzyl--D-mannopyranosyl)-(1→6)-2,3,4-tri-*O*-benzyl--D-mannopyranoside (23)**: colorless oil, R*f* = 0.5 (*n*-hexane/EtOAc, 3;1, v/v); 1H NMR (250 MHz, CDCl3) δ 3.22 (s, 3 H, C*H*3O), 3.65–3.92 (m, 13 H, H-2, 2', 3, 3', 4, 4', 5, 5', 6a, 6a', 6b, 6b', 0.5 x PhC*H*2O), 4.43–4.50 (m, 3 H, 1.5 x PhC*H*2O), 4.55–4.88 (m, 10 H, 5 x PhC*H*2O), 4.61 (d, *J*1',2' 4.7 Hz, 1 H, H-1'), 5.12 (brs, 1 H, H-1), 7.11–7.39 (m, 35 H, Ar*H*);  13C NMR (63 MHz, CDCl3) δ 54.8 (CH3O), 66.2, 69.3, 71.5, 71.6, 71.9, 72.2, 72.4, 72.9, 73.4, 74.6, 74.7, 74.9(2), 75.2(2), 79.4, 80.4, 98.1 (C-1'), 99.0 (C-1), 127.5, 127.5, 127.6, 127.7, 127.8, 127.8, 127.9, 128.0, 128.0, 128.5, 128.5 (Ar-*C*), 138.4, 138.5, 138.6, 138.8 (Ar-*C*q); IR (CHCl3 film) 1611, 1459, 1377, 1112, 1077, 1036 cm-1; Anal. Calcd for C62H66O11: C, 75.43; H, 6.74. Found: C, 75.42; H, 6.85.

**Methyl (2,3,4,6-tetra-*O*-benzyl--D-mannopyranosyl)-(1→6)-2,3,4-tri-*O*-benzyl--D-mannopyranoside (23)** : colorless oil, R*f* = 0.5 (*n*-hexane/EtOAc, 3;1, v/v); 1H NMR (250 MHz, CDCl3)  3.25 (s, 3 H, C*H*3O), 3.41–3.91 (m, 11 H, H-2, 2', 3, 3', 4, 5, 5', 6a, 6a', 6b, 6b'), 4.23–4.28 (m, 2 H, H-4, 0.5 x PhC*H*2O), 4.37–4.60 (m, 8 H, 4 x PhC*H*2O), 4.68 (s, 2 H, PhC*H*2O), 4.72 (d, *J*1',2' 4.7 Hz, 1 H, H-1'), 4.81–4.98 (m, 3 H, 1.5 x PhC*H*2O), 4.91 (d, *J*1,2 3.4 Hz, 1 H, H-1), 7.16–7.48 (m, 35 H, Ar*H*);  13C NMR (63 MHz, CDCl3) δ 54.8 (*C*H3O), 69.1, 69.8, 71.4, 72.1, 72.7, 73.2, 73.6, 74.8, 75.0, 75.3, 76.0, 80.4, 82.1, 90.8, 98.8 (C-1’), 102.2 (C-1), 127.4, 127.5, 127.6, 127.7, 128.0, 128.0, 128.2, 128.4, 128.5, 128.6 (Ar-*C*), 138.3, 138.4, 138.6, 138.9 (Ar-*C*q); IR (CHCl3 film) 1611, 1459, 1377, 1112, 1077, 1036 cm-1; Anal. Calcd for C62H66O11: C, 75.43; H, 6.74. Found: C, 75.42; H, 6.85.

**Methyl (2,3,4,6-tetra-*O*-benzyl--D-mannopyranosyl)-(1→4)-2,3,6-tri-*O*-benzyl--D-glucopyranoside (24)**: colorless oil, R*f* = 0.32 (*n*-hexane/EtOAc/CH2Cl2, 5;1;0.5, v/v);  []D20 = +18.61 (c = 2.0, CHCl3); 1H NMR (250 MHz, CDCl3)  3.39 (s, 3 H), 3.53 (dd, *J* = 3.6, 9.4 Hz, 1 H), 3.56 (d, *J* = 8.1 Hz, 1 H), 3.63 - 3.72 (m, 6 H), 3.78 (dd, *J* = 4.1, 10.0 Hz, 1 H), 3.86 (dd, *J* = 2.8, 9.1 Hz, 1 H), 3.97 (dd, *J* = 9.3, 9.3 Hz, 1 H), 4.30 and 4.20 (ABq, *J* = 12.2 2 H), 4.41 (d, *J* = 12.2 Hz, 1 H), 4.42 (d, *J* = 11.9 Hz, 1 H), 4.45 (d, *J* = 4.6 Hz, 1 H), 4.51 (d, *J* = 7.8 Hz, 1 H), 4.52 (d, *J* = 11.4 Hz, 1 H), 4.54 (dd, *J* = 2.3, 2.3 Hz, 1 H), 4.57 - 4.61 (m, 5 H), 4.67 (d, *J* = 12.1 Hz, 1 H), 4.84 (d, *J* = 10.9 Hz, 1 H), 5.09 (d, *J* = 11.7 Hz, 1 H), 5.29 (d, *J* = 2.0 Hz, 1 H), 7.13 - 7.30 (m, 35 H);  13C NMR (63 MHz, CDCl3)  55.4, 69.5, 69.9, 72.2, 72.4, 73.1, 73.3, 73.4, 73.5, 74.9, 75.0, 75.1, 76.4, 77.9, 79.9, 80.1, 81.7, 97.8, 100.6, 126.8, 127.2, 127.5, 127.7, 127.7, 127.8, 128.1, 128.2, 128.3, 128.4, 128.4, 128.5, 128.5, 128.6, 138.0, 138.5, 138.5, 138.7, 138.8, 138.9; IR (CHCl3 film) 1454, 1362, 1102, 1057 cm-1; Anal. Calcd for C49H46O9: C, 75.56; H, 5.95.

**Methyl (2,3,4,6-tetra-*O*-benzyl--D-mannopyranosyl)-(1→2)-3-*O*-benzyl-4,6-*O*-benzylidene--D-mannopyranoside (26)**: R*f* = 0.37 (*n*-hexane/EtOAc/CH2Cl2, 5;1;0.5, v/v); []D20 = +5.1 (c = 2.1, CHCl3); 1H NMR (250 MHz, CDCl3) δ 3.21 (s, 3 H, C*H*3O), 3.75–3.82 (m, 4 H, H-5, 5', 6a, 6a'), 3.90–3.95 (m, 6 H, H-2, 2', 3, 3', 6b, 6b'), 4.06 (br s, 1 H, H-4'), 4.23 (m, 1 H, H-4), 4.47–4.66 (m, 8 H, 4 x PhC*H*2O), 4.75 (d, *J*1',2' 1.8 Hz, 1 H, H-1'), 4.77 (d, *J*AB 12.3 Hz, 1 H, PhC*H*2O), 4.89 (d, *J*AB 10.6 Hz, 1 H, PhC*H*2O), 5.20 (brs, 1 H, H-1), 5.60 (s, 1 H, PhC*H*O2), 7.20–7.50 (m, 30 H, Ar*H*); 13C NMR (63 MHz, CDCl3) δ 54.9 (*C*H3O), 63.8, 69.0, 69.6, 72.1, 72.3, 72.4(2), 73.3, 73.5, 75.1, 75.2, 75.3, 76.0, 79.3, 79.6, 100.3 (C-1'), 101.0 (C-1), 101.6 (Ph*C*HO2), 126.2, 127.5, 127.6, 127.8, 127.9, 128.2, 128.3, 128.4, 128.4, 128.5, 129.0 (Ar-*C*), 137.7, 138.4(2), 138.5, 138.6, 138.7 (Ar-*C*q); IR (CHCl3 film) 1505, 1459, 1367, 1118, 1082, 1046 cm-1; Anal. Calcd for C55H58O11: C, 75.81; H, 6.53. Found: C, 73.88; H, 6.60.

**Methyl (2-*O*-acetyl-3,4,6-tri-*O*-benzyl--D-mannopyranosyl)-(1→6)-2,3,4-*O*-benzoyl--D-glucopyranoside (27)**: R*f* = 0.28 (*n*-hexane/EtOAc, 2;1, v/v); []D20 = +51.2 (c = 0.8, CHCl3); 1H NMR (250 MHz, CDCl3) δ 2.11 (s, 3 H, C*H*3CO), 3.39 (s, 3 H, C*H*3O), 3.46–3.99 (m, 7 H, H-3, 4, 5, 6a, 6b, 6a', 6b'), 4.20–4.23 (m, 1 H, H-5'), 4.35–4.89 (m, 6 H, 3 x PhC*H*2O), 4.89 (brs, 1 H, H-1), 5.21 (d, *J*1',2' 3.1 Hz, 1 H, H-1'), 5.29(dd, *J*1',2' 3.1, *J*2',3' 10.1 Hz, 1 H, H-2'), 5.35 (brs, 1 H, H-2), 5.60 (dd, *J*2',3' 9.8, *J*3',4' 9.8 Hz, 1 H, H-3'), 6.16 (dd, *J*3',4' 9.8, *J*4',5' 9.8 Hz, 1 H, H-4'), 7.16–8.00 (m, 30 H, Ar*H*); 13C NMR (63 MHz, CDCl3) δ 21.1 (*C*H3CO), 55.5 (*C*H3O), 66.3, 68.1, 68.6, 68.7, 69.6, 70.5, 71.5, 71.8, 72.1, 73.3, 74.2, 75.0, 77.9, 96.9 (C-1'), 97.9 (C-1), 127.5, 127.7, 127.8, 128.2, 128.3, 128.40, 128.43, 129.0, 129.1, 129.2, 129.7, 129.9 (Ar-*C*), 133.1, 133.4(2), 138.0, 138.2, 138.6 (Ar-*C*q), 165.2 (C=O), 165.8(2) (C=O), 170.3 (CH3*C*O); IR (CHCl3 film) 1726, 1450, 1271, 1071 cm-1; Anal. Calcd for C58H58O15: C, 69.78; H, 5.75. Found: C, 69.74; H, 5.89.

**Methyl (2-*O*-acetyl-3,4,6-tri-*O*-benzyl--D-mannopyranosyl)-(1→4)-2,3,6-tri-*O*-benzyl--D-glucopyranoside (28)**: R*f* = 0.45 (*n*-hexane/EtOAc/CH2Cl2, 7;2;1, v/v); []D20 = +29.5 (c = 0.95, CHCl3);1H NMR (250 MHz, CDCl3)  1.98 (s, 3 H, C*H*3CO), 3.37 (s, 3 H, C*H*3O), 3.46–3.56 (m, 2 H, H-6a,6b), 3.62–4.00 (m, 9 H, H-2', 3, 3', 4, 4', 5, 5', 6a', 6b'), 4.32–5.07 (m, 12 H, 6 x PhC*H*2O), 5.23 (brs, 1 H, H-1), 5.42 (d, *J*1,2 1.2 Hz, 1 H, H-1'), 5.47 (brs, 1 H, H-2), 7.11–7.32 (m, 30 H, Ar*H*); 13C NMR (63 MHz, CDCl3) δ 21.0 (*C*H3CO), 55.4 (*C*H3O), 68.8(2), 69.3, 69.6, 71.7, 72.5, 73.3(3), 73.5, 74.1, 75.2, 75.8, 78.3, 80.1, 81.8, 97.8 (C-1'), 99.4 (C-1), 127.3, 127.5, 127.6, 127.7, 127.71, 127.9, 128.0, 128.1, 128.2, 128.3, 128.33, 128.4, 128.5 (Ar-*C*), 138.0, 138.1, 138.3(2), 138.5, 138.6 (Ar-*C*q), 169.9 (CH3*C*O); IR (CHCl3 film) 1742, 1209, 1050 cm-1; Anal. Calcd for C57H62O12: C, 72.90; H, 6.65. Found: C, 72.58; H, 6.13.

**Methyl (3,4,6-tri-*O*-benzyl-2-deoxy--D-*arabino*-hexopyranosyl)-(1→6)-2,3,4-*O*-benzoyl--D-glucopyranoside (29)**: R*f* = 0.38 (n-hexane/EtOAc, 2:1, v/v); []D20 = +2.08 (c = 1.5, CHCl3); 1H NMR (250 MHz, CDCl3)  1.64 - 1.70 (m, 1 H), 2.19 (dd, *J* = 4.8, 12.8 Hz, 1H),  3.42 (s, 3 H), 3.44 - 3.46 (m, 1 H), 3.51 - 3.65 (m, 4 H), 3.82-3.97 (m, 2 H), 4.16 - 4.23 (m, 1 H), 4.36 (d, *J* = 12.2 Hz, 1 H), 4.44 - 4.54 (m, 4 H), 4.87 (d, *J* = 11.0 Hz, 1H), 4.96 (d, *J* = 2.6 Hz, 1 H), 5.19 – 5.29 (m, 2H), 5.61 (dd, *J* = 9.8, 9.8 Hz, 1 H), 6.12 (dd, *J* = 9.8, 9.8 Hz, 1 H), 7.15 - 7.42 (m, 24 H), 7.85 - 7.99 (m, 6 H); 13C NMR (63 MHz, CDCl3)  35.3, 55.7, 66.2, 68.3, 68.8, 69.8, 70.1, 70.7, 71.8, 72.3, 73.5, 74.9, 77.4, 78.3, 97.1, 97.8, 127.2, 127.7, 127.8, 128.0, 128.4, 128.5, 129.2, 129.3, 129.4, 129.8, 130.0, 130.7, 133.2, 133.4, 133.5, 138.2, 138.9, 165.3, 166.0(2); IR (CHCl3 film) 1729, 1602, 1494, 1452, 1363, 1278, 1216 cm-1; Anal. Calcd for C55H54O13: C, 71.57; H, 5.90. Found: C, 71.55; H, 5.89.

**Methyl (3,4,6-tri-*O*-benzyl-2-deoxy--D-*arabino*-hexopyranosyl)-(1→6)-2,3,4-*O*-benzoyl--D-glucopyranoside (29)** : R*f* = 0.45 (n-hexane/EtOAc, 2:1, v/v); []D20 = +1.53 (c = 0.2, CHCl3); 1H NMR (250 MHz, CDCl3)  1.67 (dd, *J* = 11.9, 21.8 Hz, 1H), 2.46 (dd, *J* = 4.2, 11.7 Hz, 1H), 3.35 (m, 1 H), 3.46 (s, 3 H), 3.49 (m, 1 H), 3.60 - 3.67 (m, 3 H), 4.12 (dd, *J* = 1.8, 9.4 Hz, 1 H), 4.26 (m, 1 H),  4.40 (dd, *J* = 1.8, 6.9 Hz, 1 H), 4.45 - 4.61 (m, 5 H), 4.70 (d, *J* = 9.5 Hz, 1 H), 4.88 (d, *J* = 9.0 Hz, 1 H), 5.24-5.32 (m, 2 H), 5.57 (dd, *J* = 8.3, 8.3 Hz, 1 H), 6.16 (dd, *J* = 8.0, 8.0 Hz, 1 H), 7.17 - 7.53 (m, 24 H), 7.85 - 8.00 (m, 6 H); 13C NMR (63 MHz, CDCl3)  36.5, 55.6, 68.0, 68.9, 69.4, 69.5, 70.7, 71.5, 72.2, 73.5, 75.1, 75.4, 78.1, 79.4, 97.0, 100.8, 120.2, 127.6, 127.8(2), 127.9, 128.1, 128.3, 128.4, 128.5, 128.6, 129.1, 129.3, 129.4, 129.8, 129.9, 130.1, 133.2, 133.5, 138.4(2), 138.5, 165.5, 165.9, 166.0; IR (CHCl3 film) 1729, 1602, 1494, 1452, 1363, 1278, 1216 cm-1; Anal. Calcd for C55H54O13: C, 71.57; H, 5.90. Found: C, 71.55; H, 5.89.

**Methyl (3,4,6-tri-*O*-benzyl-2-deoxy--D-*arabino*-hexopyranosyl)-(1→6)-2,3,4-*O*-benzoyl--D-mannopyranoside (30)**: R*f* = 0.43 (n-hexane/EtOAc, 2:1,  v/v); []D20 = -0.55 (c = 1, CHCl3); 1H NMR (250 MHz, CDCl3)  1.63 (m, 1 H), 2.18 (dd, *J* = 5.0, 12.8 Hz, 1H),  3.47 (s, 3 H), 3.45 - 3.71 (m, 5 H), 3.86 - 4.0 (m, 2 H), 4.12 (m, 1 H), 4.34 - 4.55 (m, 5 H), 4.86 (d, *J* = 10.9 Hz, 1 H), 4.95 - 5.0 (m, 2 H), 5.64 (dd, *J* = 1.7, 3.1 Hz, 1 H), 5.82 - 5.99 (m, 2 H), 7.15 - 7.58 (m, 24 H), 7.81 - 8.11(m, 6 H); 13C NMR (63 MHz, CDCl3)  35.3, 55.6, 66.5, 67.9, 68.8, 69.4, 70.2, 70.8, 71.0, 71.7, 73.5, 75.0, 77.7, 78.3, 97.8, 98.7, 127.6, 127.7, 128.0, 128.4(2), 128.5, 128.6, 128.7, 129.3, 129.5, 129.6, 129.9, 130.0(2), 133.2, 133.4, 133.6, 138.2, 138.9, 165.5, 165.7(2); IR (CHCl3 film) 1729, 1452, 1261, 1108 cm-1; Anal. Calcd for C55H54O13: C, 71.57; H, 5.90. Found: C, 71.58; H, 5.95.

**Methyl (3,4,6-tri-*O*-benzyl-2-deoxy--D-*arabino*-hexopyranosyl)-(1→6)-2,3,4-*O*-benzoyl--D-mannopyranoside (30)**: R*f* = 0.53 (n-hexane/EtOAc, 2:1, v/v); []D20 = -1.4 (c = 0.1, CHCl3); 1H NMR (250 MHz, CDCl3)  1.69 (dd, *J* = 11.7, 21.7 Hz, 1H), 2.49 (dd, *J* = 4.4, 12.0 Hz, 1H), 3.37 (m, 1 H), 3.49 (m, 1 H), 3.52 (s, 3 H), 3.62 - 3.73 (m, 4 H), 4.14 - 4.30 (m, 2 H), 4.44 - 4.73 (m, 6 H), 4.89 (d, *J* = 10.8 Hz, 1 H), 4.99 (d, *J* = 1.5 Hz, 1 H), 5.67 (s, 1 H), 5.87 -5.90 (m, 2 H), 7.18 - 7.7 2(m, 24 H), 7.81 - 8.12 (m, 6 H); 13C NMR (63 MHz, CDCl3)  36.7, 55.5, 67.3, 68.5, 69.4, 69.8, 70.1, 70.5, 71.6, 73.5, 75.1, 75.4, 78.2, 79.5, 98.6, 100.8, 127.6, 127.8, 128.1, 128.4(2), 128.5, 128.6, 128.7, 129.2, 129.3, 129.6, 129.9(2), 130.1, 133.2, 133.6(2), 134.1, 138.(2), 165.6(2), 165.8, 166.0; IR (CHCl3 film) 1729, 1452, 1261, 1108 cm-1; Anal. Calcd for C55H54O13: C, 71.57; H, 5.90. Found: C, 71.50; H, 5.91.

**Methyl (3,4,6-tri-*O*-benzyl-2-deoxy--D-*arabino*-hexopyranosyl)-(1→6)-2,3,4-tri-*O*-benzyl--D-glucopyranoside (31)**4: R*f* = 0.43 (n-hexane/EtOAc, 2:1, v/v); []D20 = +1.22 (c = 1, CHCl3); 1H NMR (250 MHz, CDCl3)  1.63-1.74 (m, 1 H), 2.30 (dd, *J* = 4.9, 12.9 Hz, 1H), 3.34 (s, 3 H), 3.46 - 4.03 (m, 11 H), 4.37 - 5.01 (m, 14 H), 7.12 - 7.38 (m, 30 H) ; 13C NMR (63 MHz, CDCl3)  35.4, 55.2, 65.8, 68.8, 69.9, 71.0, 71.8, 73.4, 73.5, 75.0(2), 75.9, 77.4, 77.9, 78.3, 80.1, 82.4, 97.9, 98.1, 127.6, 127.7, 127.9, 128.0(2), 128.1, 128.2, 128.4(2), 128.5(2), 128.6(2), 138.3, 138.5, 138.7, 138.8.

**Methyl (3,4,6-tri-*O*-benzyl-2-deoxy--D-*arabino*-hexopyranosyl)-(1→6)-2,3,4-tri-*O*-benzyl--D-glucopyranoside (31)**4: R*f* = 0.55 (n-hexane/EtOAc, 2:1, v/v); []D20 = +0.96 (c = 0.5, CHCl3); 1H NMR (250 MHz, CDCl3)  1.62 (dd, *J* = 11.6, 21.9 Hz, 1H), 2.16 (dd, *J* = 3.8, 12.3 Hz, 1H), 3.36 (s, 3 H), 3.40 - 4.18 (m, 11 H), 4.49 - 5.02 (m, 14 H), 7.18 - 7.34 (m, 30 H); 13C NMR (63 MHz, CDCl3)  36.6, 55.3, 67.7, 69.6, 69.7, 71.5, 73.5(2), 74.9, 75.1, 75.4, 75.9, 77.5, 78.3, 79.4, 79.9, 82.4, 98.1, 100.1, 127.6, 127.8, 128.0, 128.1, 128.3, 128.4, 128.5(2), 128.6, 138.2, 138.4, 138.6, 138.9.

**Methyl (3,4,6-tri-*O*-benzyl-2-deoxy--D-*arabino*-hexopyranosyl)-(1→4)-2,3,6-*O*-benzyl--D-mannopyranoside (32)** : R*f* = 0.60 (n-hexane/EtOAc, 2:1, v/v); []D20 = +2.16 (c = 1, CHCl3); 1H NMR (250 MHz, CDCl3)  1.52-1.64  (m, 1 H), 2.12 (dd, *J* = 4.4, 12.8 Hz, 1H), 3.36 (s, 3 H), 3.52 - 3.91 (m, 9 H), 4.04 (dd, *J* = 8.4, 8.4 Hz, 1 H), 4.34 - 4.82 (m, 14 H), 5.43 (d, *J* = 2.8 Hz, 1 H), 7.14 - 7.30 (m, 30 H); 13C NMR (63 MHz, CDCl3)  35.8, 55.0, 68.7, 70.3, 71.5, 71.5, 71.8, 71.9, 72.7, 73.1, 73.5, 73.6, 74.0, 74.9, 77.6, 78.3, 80.7, 99.0, 99.4, 127.4, 127.5, 127.6, 127.7, 127.8(2), 128.0, 128.4(2), 128.5(2), 138.3, 138.4, 138.7, 138.8, 138.9; Anal. Calcd for C55H60O10: C, 74.98; H, 6.86. Found: C, 74.97; H, 6.85.

**Methyl (3,4,6-tri-*O*-benzyl-2-deoxy--D-*arabino*-hexopyranosyl)-(1→2)-3-*O*-benzyl-4,6-*O*-benzylidene--D-mannopyranoside (33)** : R*f* = 0.65 (n-hexane/EtOAc, 2:1, v/v); []D20 = +1.33 (c = 2, CHCl3); 1H NMR (250 MHz, CDCl3)  1.71 (m, 1 H), 2.45 (dd, *J* = 4.6, 13.0 Hz, 1H), 3.22 (s, 3 H),  3.52-4.11 (m, 10 H), 4.22 (dd, *J* = 4.0, 9.5 Hz, 1 H), 4.49 - 4.92 (m, 9 H), 5.19 (d, *J* = 2.8 Hz, 1 H), 5.62 (s, 1 H), 7.16 - 7.52 (m, 25 H); 13C NMR (63 MHz, CDCl3)  35.5, 54.9, 63.9, 69.0, 69.2, 71.4, 72.9, 73.0, 73.6, 75.2, 76.1, 76.2, 77.4, 78.5, 79.0, 100.1, 101.2, 101.6, 126.2, 127.6, 127.7, 127.8, 128.0, 128.1, 128.3, 128.5(2), 129.0, 137.8, 138.2, 138.4, 138.6, 138.8; Anal. Calcd for C48H52O10: C, 73.08; H, 6.64. Found: C, 73.06; H, 6.64.

**3,4,6-Tri-*O*-benzyl-2-deoxy--D-*arabino*-hexopyranosyl-(1→3)-1,2:5,6-di-*O*-isopropylidene--D-glucofuranose (34)**5 : R*f* = 0.65 (n-hexane/EtOAc, 2:1, v/v); []D20 = +0.08 (c = 0.6, CHCl3); 1H NMR (250 MHz, CDCl3)  1.23 (s, 3 H), 1.32 (s, 3 H), 1.40 (s, 3 H), 1.48 (s, 3 H), 1.72 (m, 1 H), 2.27 (dd, *J* = 4.9, 12.9 Hz, 1H), 3.61 - 3.81 (m, 4 H), 3.93 - 4.14 (m, 5 H), 4.25 (d, *J* = 4.3 Hz 1 H), 4.48 - 4.70 (m, 6 H), 4.89 (d, *J* = 10.6 Hz, 1 H), 5.25 (d, *J* = 2.5 Hz 1 H), 5.82 (d, *J* = 3.53 Hz, 1 H), 7.15 - 7.35 (m, 15 H); 13C NMR (63 MHz, CDCl3)  25.6, 26.2, 27.0(2), 35.3, 67.8, 69.1, 71.8, 72.0, 72.6, 73.2, 73.7, 75.3, 77.3, 78.3, 80.4, 83.9, 98.8, 105.4, 109.3, 112.0, 127.8, 127.9, 128.0, 128.2, 128.5(2), 138.2, 138.4, 138.6

## References

1. G.. Singh, and H. Vankayalapati, *Tetrahedron:Asymmetry,* 2001, **12**, 1373.

2. B. A .Garcia, J. L. Poole and D. Y.Gin, *J. Am.Chem. Soc*., 1997, **119**, 7597.

3. G.. Singh, and H. Vankayalapati, *Tetrahedron:Asymmetry*,2000**, 11**, 125.

4. S. Hashimoto, A. Sano, H. Sakamoto, M. Nakajima, Y. Yanagiya and S. Ikegami, *Synlett* 1995, 1271.

5. H. Bielawska and M. Michalska, *J. Carbohydr. Chem*., 1991, **10**, 107.
